# Supplementary material
Source: publisher figshare collection journal article supplement (https://acs.figshare.com/ndownloader/files/5071816)

**Supporting Information Available.** DLS results by Cumulant analysis in a KCl-free G-buffer at pH 7.4 and 25°C. Closed and open symbols show Cumulant and CONTIN analyses. Relationships between  $1/\tau$  and  $q^2$  at actin concentrations of (a) 0.84 (b) 2.1 and (c) 2.5  $\text{mg} \cdot \text{ml}^{-1}$ . Since the linear relationship was not obtained by Cumulant analysis at any actin concentrations, the  $D$  was defined using  $\tau$  only at  $\theta=90^\circ$ . (d) Diffusion coefficients as a function of actin concentration. The  $D_0$  and concentration virial coefficient were determined using Cumulant as  $96.2 \times 10^{-12} \text{ m}^2 \cdot \text{s}^{-1}$  and  $2.72 \times 10^{-12} \text{ m}^2 \cdot \text{ml} \cdot \text{s}^{-1} \cdot \text{mg}^{-1}$  at 25°C by fitting five points at the lower actin concentrations.

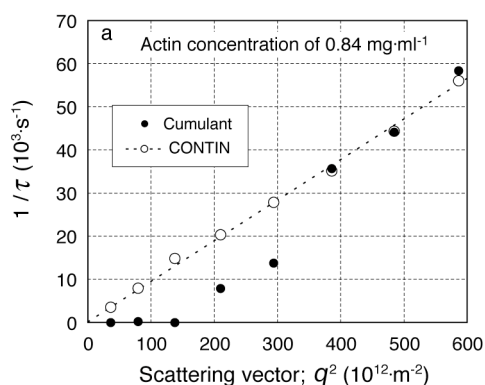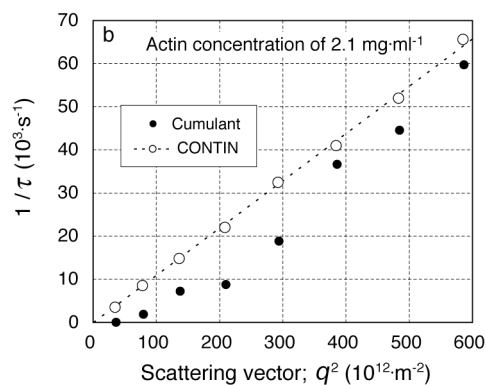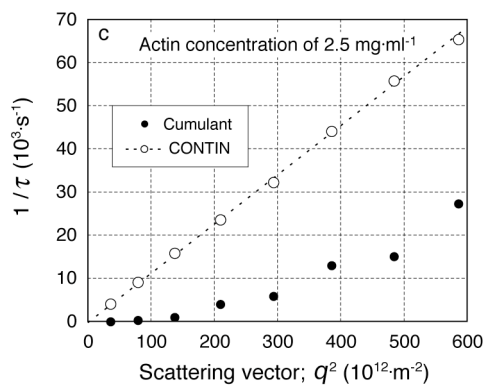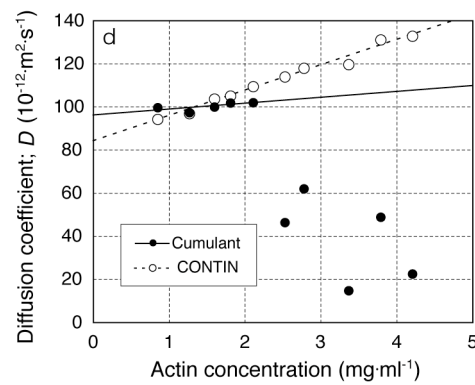

Supplement: Supplementary file 1 [file 5071816]
